# Supplementary material
Source: PubMed Central journal article supplement (PMC5975964)

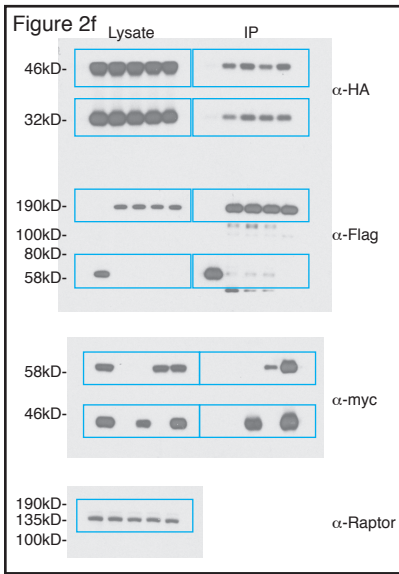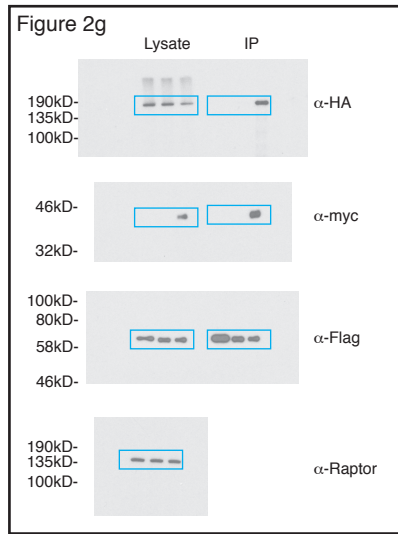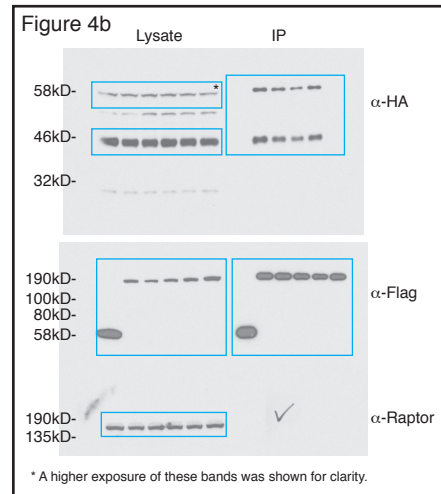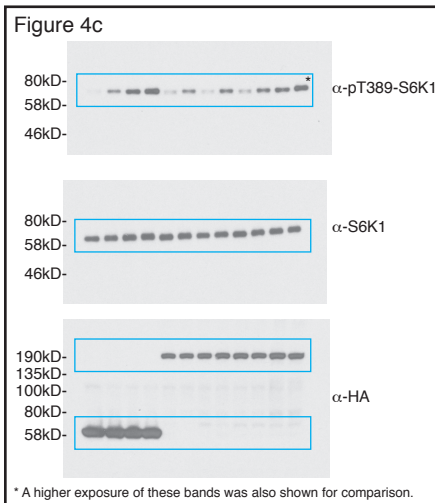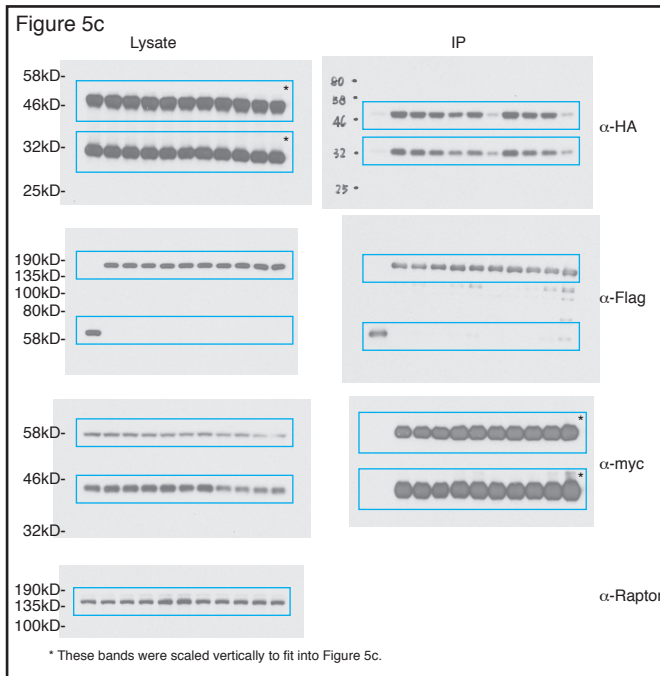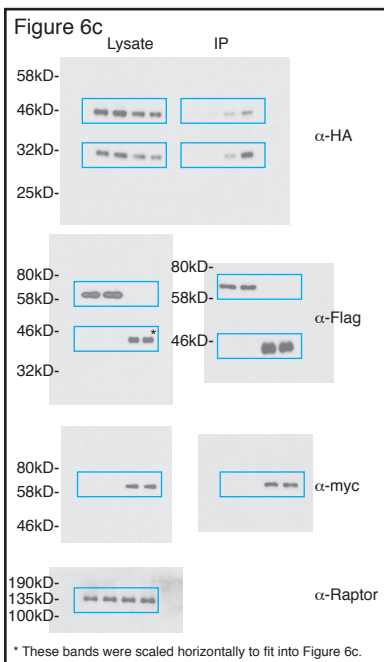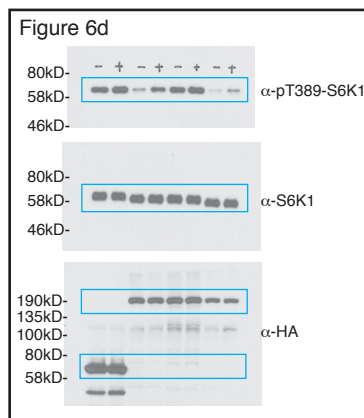

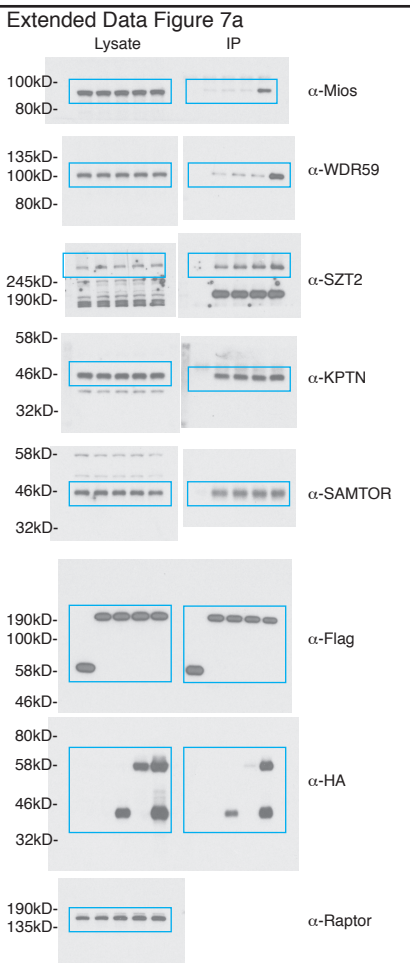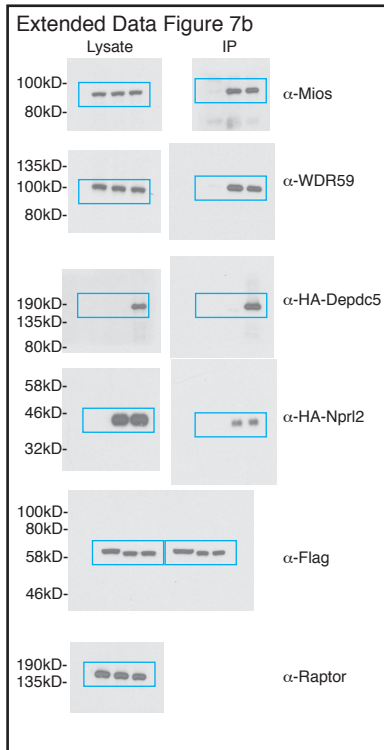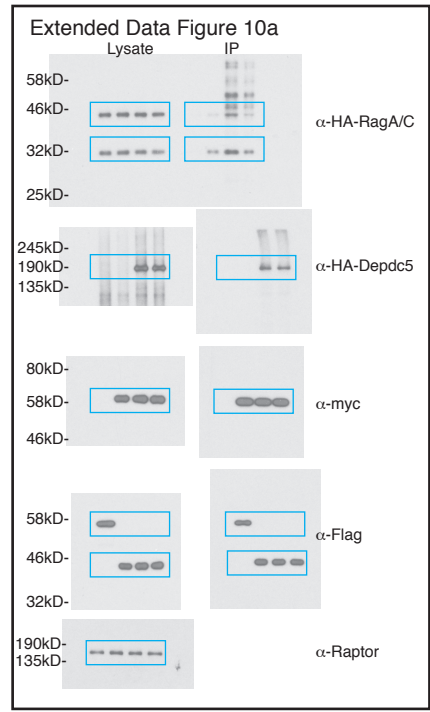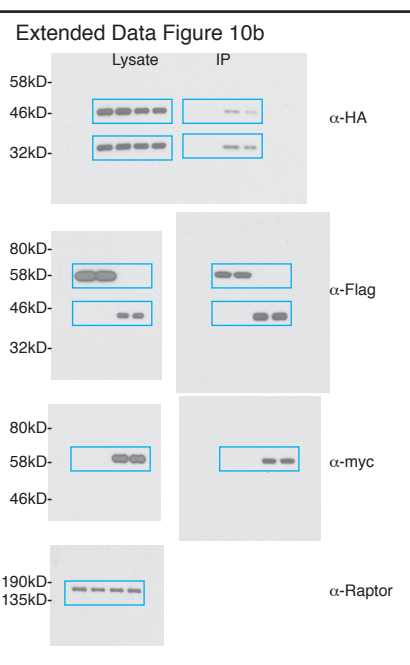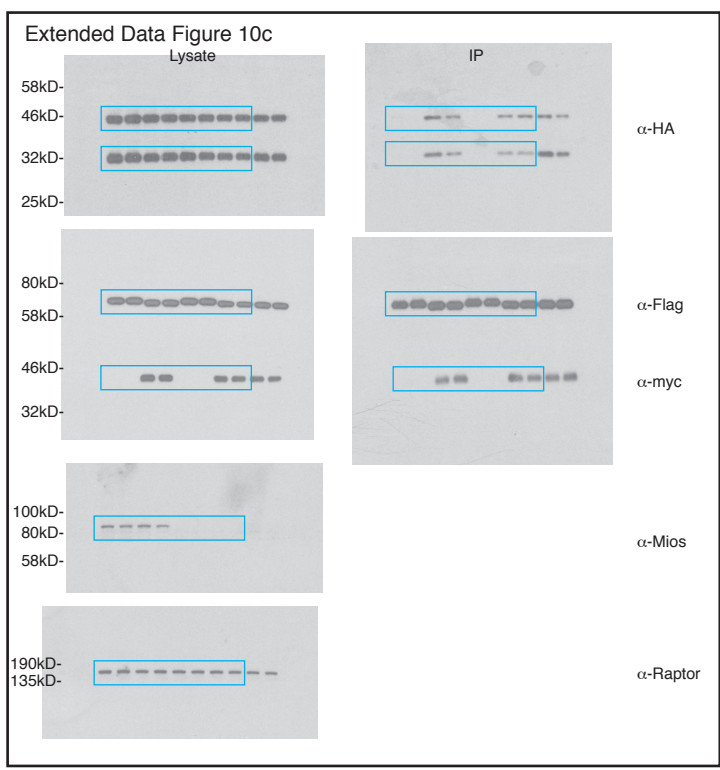

Extended Data Figure 10d

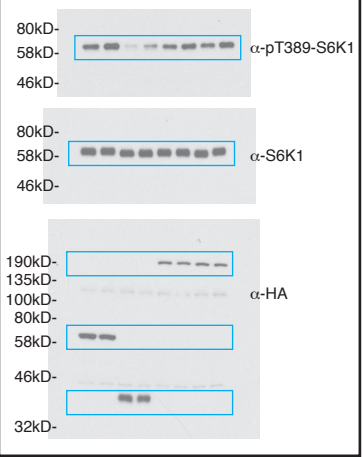

Supplement: NIHMS955929-supplement-Supplementary_Figure_1.pdf [file NIHMS955929-supplement-Supplementary_Figure_1.pdf]
